# Supplementary material for: The zebrafish orthologue of the human hepatocerebral disease gene MPV17 plays pleiotropic roles in mitochondria
Source: PubMed Central journal article supplement (PMC6451431; doi:10.1242/dmm.037226), 2019-03-14
Supplement: dmm-12-037226-s1.pdf [file dmm-12-037226-s1.pdf]

## Appendix A. Supplementary information

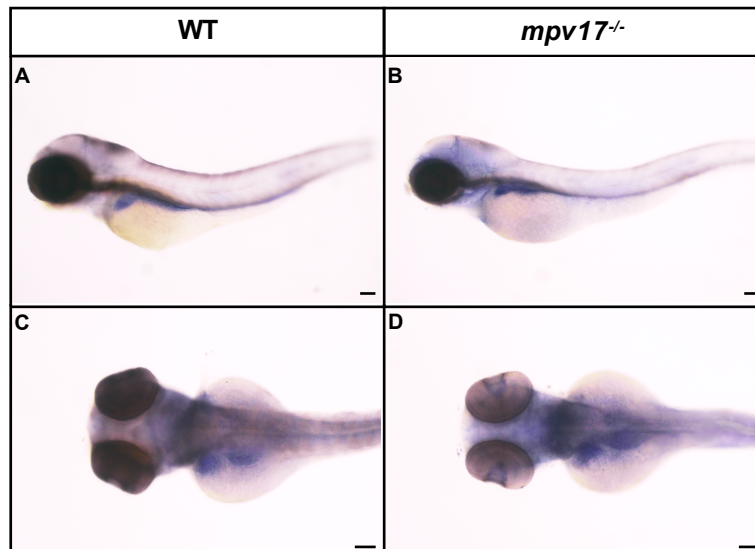

**Figure S1. Expression analysis of zebrafish *mpv17-l2* gene in wild-type and *mpv17<sup>-/-</sup>* mutant larvae at 3 dpf.** Lateral (A-B) and dorsal (C-D) view of WISH with anti-*mpv17l2* probe on 3 dpf wild-type and *mpv17<sup>-/-</sup>* larvae. Bars, 100  $\mu$ m.

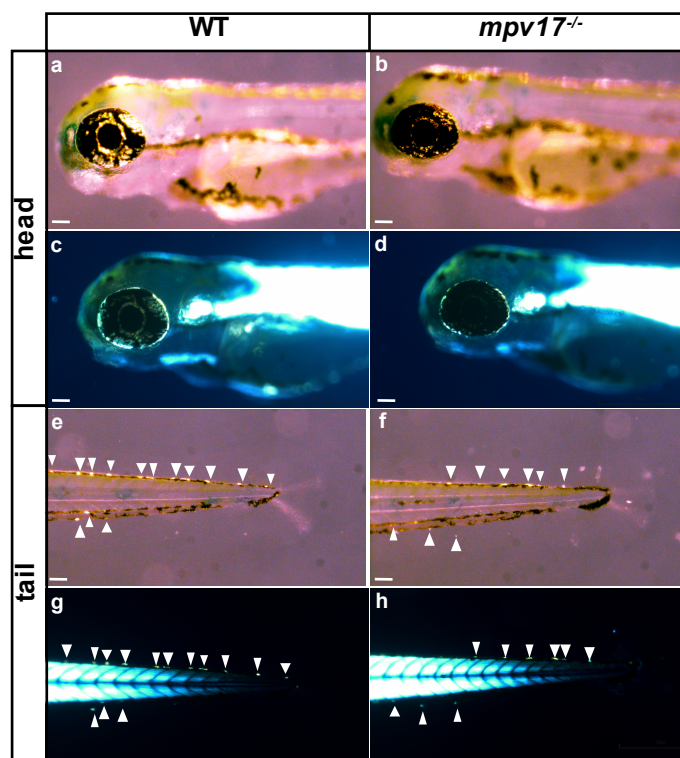

**Figure S2. Comparison between different counting methods of iridophores in wild-type and *mpv17<sup>-/-</sup>* larvae at 3 dpf.** Bright-field pictures (a, b, e, f), acquired according to Krauss and colleagues' method: the angle of illumination had been adjusted individually to allow optimal visualization of iridophores (Krauss *et al.*, 2013). Birefringence images (c, d, g, h), acquired by using a polarizer and an analyser lens, according to previously published methods (Smith *et al.*, 2013). Representative images of iridophores along the tail (g, h) or off the eye (c, d) were taken without the need of modifying the incident light and by completely abolishing background. The arrows point to iridophores. Bars, 100  $\mu$ m.

| Gene symbol | Description                                                                                                                           | # of experiments with MPV17 | %concordant   | Pearson Coef   | Pearson p-val.    |
|-------------|---------------------------------------------------------------------------------------------------------------------------------------|-----------------------------|---------------|----------------|-------------------|
| MPV17       | MpV17 mitochondrial inner membrane protein [Source:HGNC Symbol;Acc:7224]                                                              | 424                         |               |                |                   |
| MAGED1      | melanoma antigen family D, 1 [Source:HGNC Symbol;Acc:6813]                                                                            | 176                         | 88.6363636364 | 0.519030597265 | 1.28356075802e-30 |
| GLB1        | galactosidase, beta 1 [Source:HGNC Symbol;Acc:4296]                                                                                   | 149                         | 91.9463087248 | 0.510492925155 | 1.62691766014e-29 |
| PGAM1       | phosphoglycerate mutase 1 (brain) [Source:HGNC Symbol;Acc:8888]                                                                       | 172                         | 67.7906976744 | 0.508691604107 | 2.75498214289e-29 |
| CAD         | carbamoyl-phosphate synthetase 2, aspartate transcarbamylase, and dihydroorotase [Source:HGNC Symbol;Acc:1424]                        | 176                         | 66.4772727273 | 0.503918624571 | 1.0957433225e-28  |
| CNDP2       | CNDP dipeptidase 2 (metallopeptidase M20 family) [Source:HGNC Symbol;Acc:24437]                                                       | 175                         | 84.0          | 0.503598549838 | 1.20110287317e-28 |
| YWHA8       | tyrosine 3-monooxygenase/tryptophan 5-monooxygenase activation protein, beta polypeptide [Source:HGNC Symbol;Acc:12849]               | 191                         | 91.0994764398 | 0.49560445747  | 1.15309824315e-27 |
| FUCA2       | fucosidase, alpha-L-2, plasma [Source:HGNC Symbol;Acc:4008]                                                                           | 150                         | 92.6666666667 | 0.490884702241 | 4.26364953099e-27 |
| FANCF       | Fanconi anemia, complementation group F [Source:HGNC Symbol;Acc:3587]                                                                 | 100                         | 89.0          | 0.486093506765 | 1.57520696874e-26 |
| GBA         | glucosidase, beta, acid [Source:HGNC Symbol;Acc:4177]                                                                                 | 150                         | 67.3333333333 | 0.485906687821 | 1.65686485517e-26 |
| IDH3G       | isocitrate dehydrogenase 3 (NAD+) gamma [Source:HGNC Symbol;Acc:5386]                                                                 | 139                         | 90.6474820144 | 0.482629959765 | 4.0002403426e-26  |
| HEXB        | hexosaminidase B (beta polypeptide) [Source:HGNC Symbol;Acc:4879]                                                                     | 165                         | 85.4545454545 | 0.477602077649 | 1.51878235204e-25 |
| TBL1X       | transducin (beta)-like 1X-linked [Source:HGNC Symbol;Acc:11585]                                                                       | 162                         | 75.9259259259 | 0.468468216355 | 1.62131042545e-24 |
| CD81        | CD81 molecule [Source:HGNC Symbol;Acc:1701]                                                                                           | 180                         | 91.6666666667 | 0.467042697849 | 2.33127614232e-24 |
| CTSD        | cathepsin D [Source:HGNC Symbol;Acc:2529]                                                                                             | 173                         | 91.9075144509 | 0.463243470992 | 6.08646420812e-24 |
| MCFD2       | multiple coagulation factor deficiency 2 [Source:HGNC Symbol;Acc:18451]                                                               | 197                         | 89.3401015228 | 0.462693462979 | 6.98665953951e-24 |
| CTSA        | cathepsin A [Source:HGNC Symbol;Acc:9251]                                                                                             | 114                         | 90.350877193  | 0.461043508314 | 1.05517852598e-23 |
| NME2        | NME/NM23 nucleoside diphosphate kinase 2 [Source:HGNC Symbol;Acc:7850]                                                                | 118                         | 91.5254237288 | 0.455438251649 | 4.2115002682e-23  |
| PPIB        | peptidylprolyl isomerase B (cyclophilin B) [Source:HGNC Symbol;Acc:9255]                                                              | 155                         | 88.3870967742 | 0.454083035203 | 5.86228108546e-23 |
| SLC38A10    | solute carrier family 38, member 10 [Source:HGNC Symbol;Acc:28237]                                                                    | 123                         | 95.1219512195 | 0.451567966058 | 1.07892726146e-22 |
| SERPINH1    | serpin peptidase inhibitor, clade H (heat shock protein 47), member 1, (collagen binding protein 1) [Source:HGNC Symbol;Acc:1546]     | 164                         | 82.0731707317 | 0.446791749227 | 3.38908757451e-22 |
| PPP1CA      | protein phosphatase 1, catalytic subunit, alpha isozyme [Source:HGNC Symbol;Acc:9281]                                                 | 125                         | 87.2          | 0.44510334377  | 5.05752314664e-22 |
| PLOD1       | procollagen-lysine, 2-oxoglutarate 5-dioxygenase 1 [Source:HGNC Symbol;Acc:9081]                                                      | 129                         | 95.3488372093 | 0.441833289083 | 1.09120863073e-21 |
| DBP         | D site of albumin promoter (albumin D-box) binding protein [Source:HGNC Symbol;Acc:2697]                                              | 207                         | 83.0917874396 | 0.440205250855 | 1.59527489813e-21 |
| TSEN15      | tRNA splicing endonuclease 15 homolog (S. cerevisiae) [Source:HGNC Symbol;Acc:16791]                                                  | 60                          | 80.5263157895 | 0.437951472304 | 2.68109324334e-21 |
| GNS         | glucosamine (N-acetyl)-6-sulfatase [Source:HGNC Symbol;Acc:4422]                                                                      | 190                         | 89.4736842105 | 0.43732697844  | 2.68963699032e-21 |
| CRTAP       | cartilage associated protein [Source:HGNC Symbol;Acc:2379]                                                                            | 190                         | 92.9203539823 | 0.433118049145 | 8.13625635339e-21 |
| GLG1        | golgi glycoprotein 1 [Source:HGNC Symbol;Acc:4316]                                                                                    | 113                         | 89.8989898989 | 0.429986746168 | 1.65175956867e-20 |
| BACE1       | beta-site APP-cleaving enzyme 1 [Source:HGNC Symbol;Acc:933]                                                                          | 198                         | 82.7586206897 | 0.422905015426 | 7.97073966727e-20 |
| ALG5        | asparagine-linked glycosylation 5, dolichyl-phosphate beta-glucosyltransferase homolog (S. cerevisiae) [Source:HGNC Symbol;Acc:20266] | 116                         | 87.2727272727 | 0.417421141773 | 2.62930547926e-19 |
| NEU1        | sialidase 1 (lysosomal sialidase) [Source:HGNC Symbol;Acc:7758]                                                                       | 150                         | 87.2727272727 | 0.416638528548 | 3.11202428193e-19 |
| ZFP1        | zinc finger protein 1 homolog (mouse) [Source:HGNC Symbol;Acc:23328]                                                                  | 55                          | 86.3636363636 | 0.415561586846 | 3.92158880601e-19 |
| GSTO1       | glutathione S-transferase omega 1 [Source:HGNC Symbol;Acc:13312]                                                                      | 176                         | 100.0         | 0.415357065956 | 4.09724242333e-19 |
| TSEN34      | tRNA splicing endonuclease 34 homolog (S. cerevisiae) [Source:HGNC Symbol;Acc:15506]                                                  | 54                          | 84.2857142857 | 0.414082359895 | 5.38025750368e-19 |
| HEXA        | hexosaminidase A (alpha polypeptide) [Source:HGNC Symbol;Acc:4878]                                                                    | 140                         | 87.6033057851 | 0.413013651004 | 6.75470049517e-19 |
| GSS         | glutathione synthetase [Source:HGNC Symbol;Acc:4624]                                                                                  | 121                         |               |                |                   |

**Figure S3. Bioinformatics search on CORD platform to identify *MPV17* co-regulated genes.** The table shows a list of *MPV17* co-regulated genes based on the number of experiments, the percentage of concordance, Pearson coefficient and Pearson p-value.

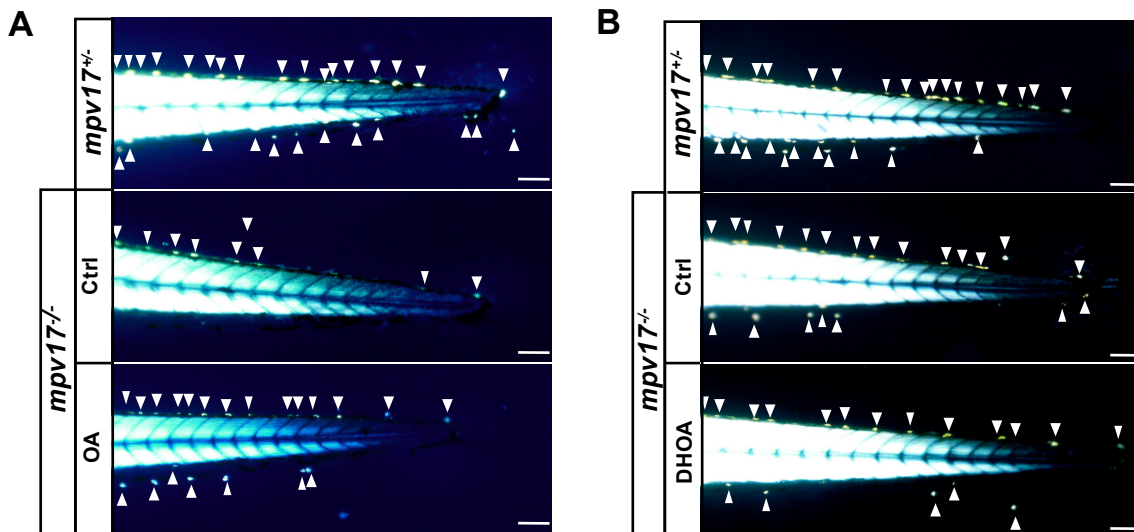

**Figure S4. Administration of pyrimidine precursors to *mpv17* heterozygous and homozygous mutants and evaluation of iridophore phenotype at 3 dpf.** Tail region birefringent image of 3 dpf larvae treated with 1  $\mu$ M OA (A) and 100  $\mu$ M DHOA (B). The arrows point to iridophores. Bars, 100  $\mu$ m.
